# Supplementary material for: Plasma Bile Acid Profile in Patients with and without Type 2 Diabetes
Source: MDPI journal article supplement (doi:10.3390/metabo11070453), 2021-07-14
Supplement: s1 [file s1]

**Supplementary Table S1** - Plasma BA concentrations in the whole population, stratified by sex and T2DM status.

|               | Men (n=142)         |                     |          | Women (n=184)       |                     |          |
|---------------|---------------------|---------------------|----------|---------------------|---------------------|----------|
|               | Without T2DM (n=22) | With T2DM (n=120)   | P-values | Without T2DM (n=80) | With T2DM (n=104)   | P-values |
| TUDCA (ng/mL) | 3.5 (3.5-3.5)       | 3.5 (3.5-3.5)       | 0.676    | 3.5 (3.5-3.5)       | 3.5 (3.5-3.5)       | 0.583    |
| GUDCA (ng/mL) | 39.9 (16.4-96.4)    | 21.7 (11.9-62.1)    | 0.103    | 26.5 (12.7-55.4)    | 23.0 (11.1-52.7)    | 0.288    |
| GCA (ng/mL)   | 41.8 (27.5-87.6)    | 50.9 (27.1-100.0)   | 0.664    | 37.9 (23.2-75.4)    | 38.7 (21.9-65.5)    | 0.540    |
| TCDCA (ng/mL) | 11.8 (7.8-31.1)     | 45.7 (23.9-90.3)    | <0.0001  | 14.4 (7.8-30.9)     | 35.5 (20.2-61.8)    | <0.0001  |
| TDCA (ng/mL)  | 3.5 (3.5-11.6)      | 12.8 (3.5-36.6)     | 0.0001   | 3.5 (3.5-10.2)      | 12.8 (3.5-26.1)     | 0.0004   |
| UDCA (ng/mL)  | 10.6 (3.5-26.5)     | 7.4 (3.5-26.6)      | 0.472    | 11.5 (3.5-27.9)     | 10.2 (3.5-26.2)     | 0.911    |
| CA (ng/mL)    | 16.6 (6.8-42.8)     | 8.3 (3.5-50.7)      | 0.143    | 24.6 (9.5-100.3)    | 9.5 (3.5-39.9)      | 0.0001   |
| GCDCA (ng/mL) | 144.2 (64.2-228.7)  | 284.0 (145.6-565.0) | 0.003    | 101.2 (56.9-184.0)  | 218.3 (124.2-357.3) | <0.0001  |
| HDCA (ng/mL)  | 3.5 (3.5-3.5)       | 3.5 (3.5-4.9)       | 0.003    | 3.5 (3.5-3.5)       | 3.5 (3.5-6.8)       | <0.0001  |
| GDCA (ng/mL)  | 29.5 (19.8-79.9)    | 111.7 (53.4-234.0)  | <0.0001  | 33.9 (16.9-72.6)    | 91.4 (59.4-156.4)   | <0.0001  |
| CDCA (ng/mL)  | 45.3 (22.9-111.2)   | 45.4 (14.7-143.3)   | 0.685    | 54.1 (23.2-160.7)   | 53.8 (14.3-121.2)   | 0.338    |
| GLCA (ng/mL)  | 3.5 (3.5-3.5)       | 3.5 (3.5-5.1)       | 0.040    | 3.5 (3.5-3.5)       | 3.5 (3.5-8.7)       | <0.0001  |
| DCA (ng/mL)   | 68.4 (24.3-123.4)   | 123.1 (62.6-252.4)  | 0.020    | 100.8 (43.7-176.1)  | 151.5 (72.1-242.0)  | 0.016    |
| TCA (ng/mL)   | 15.8 (10.6-26.8)    | 8.0 (5.0-19.5)      | 0.0002   | 18.6 (10.9-34.9)    | 7.0 (5.0-13.0)      | <0.0001  |

Sample size,  $n=326$ . Data are expressed medians and interquartile ranges (in parenthesis). Differences between the patient groups were tested by the Mann-Whitney test.

**Abbreviations:** TUDCA, Tauroursodeoxycholic acid; TCA, taurocholic acid; GUDCA, glyoursodeoxycholic acid; GCA, glycocholic acid; TCDCA, taurochenodeoxycholic acid; TDCA, taurodeoxycholic acid; CA, cholic acid; UDCA, ursodeoxycholic acid, GCDCA, glycochenodeoxycholic acid; GDCA, glycodeoxycholic acid; CDCA, chenodeoxycholic acid; GLCA, glycolithocholic acid; DCA deoxycholic acid; HDCA, hyodeoxycholic acid.

**Supplementary Table S2** - Plasma BA concentrations in the whole population, simultaneously stratified by T2DM status and use of metformin.

|               | Without T2DM<br>(n=102)<br>(Group A) | With T2DM and<br>without metformin<br>use (n=48) (Group B) | With T2DM and with<br>metformin use (n=176)<br>(Group C) | P-values<br>for trend | P-values for<br>trend* | P-values for<br>A vs. B | P-values for A<br>vs. C | P-values for B<br>vs. C |
|---------------|--------------------------------------|------------------------------------------------------------|----------------------------------------------------------|-----------------------|------------------------|-------------------------|-------------------------|-------------------------|
| TUDCA (ng/mL) | 3.5 (3.5-3.5)                        | 3.5 (3.5-3.5)                                              | 3.5 (3.5-3.5)                                            | 0.593                 | 0.142                  | 0.364                   | 0.425                   | 0.419                   |
| GUDCA (ng/mL) | 32.1 (13.7-57.7)                     | 27.0 (12.8-79.8)                                           | 21.8 (11.1-55.2)                                         | 0.166                 | 0.229                  | 0.460                   | 0.041                   | 0.115                   |
| GCA (ng/mL)   | 40.4 (25.6-77.1)                     | 62.3 (26.5-151.6)                                          | 43.4 (22.9-73.1)                                         | 0.078                 | 0.003                  | 0.028                   | 0.409                   | 0.013                   |
| TCDCa (ng/mL) | 13.7 (7.9-30.9)                      | 26.0 (68.3-170.9)                                          | 38.9 (21.7-63.4)                                         | <0.001                | <0.001                 | <0.001                  | <0.001                  | 0.008                   |
| TDCA (ng/mL)  | 3.5 (3.5-10.4)                       | 11.2 (3.5-36.6)                                            | 12.8 (3.5-28.8)                                          | <0.001                | <0.001                 | <0.001                  | <0.001                  | 0.437                   |
| UDCA (ng/mL)  | 11.5 (3.5-27.4)                      | 7.2 (3.5-26.9)                                             | 8.7 (3.5-26.4)                                           | 0.842                 | 0.995                  | 0.377                   | 0.280                   | 0.459                   |
| CA (ng/mL)    | 19.7 (8.6-72.4)                      | 32.4 (5.2-158.3)                                           | 7.1 (3.5-32.5)                                           | <0.00                 | <0.001                 | 0.486                   | <0.001                  | <0.001                  |
| GCDCA (ng/mL) | 109.1 (58.6-191.4)                   | 298.1 (126.9-581.2)                                        | 239.0 (132.5-444.6)                                      | <0.001                | <0.001                 | <0.001                  | <0.001                  | 0.194                   |
| HDCA (ng/mL)  | 3.5 (3.5-3.5)                        | 3.5 (3.5-3.5)                                              | 3.5 (3.5-6.8)                                            | <0.001                | <0.001                 | 0.019                   | <0.001                  | <0.001                  |
| GDCA (ng/mL)  | 31.3 (17.3-75.8)                     | 78.8 (40.2-143.8)                                          | 109.3 (60.5-198.8)                                       | <0.001                | <0.001                 | <0.001                  | <0.001                  | 0.048                   |
| CDCA (ng/mL)  | 51.7 (23.4-131.7)                    | 71.4 (20.8-175.2)                                          | 45.6 (14.6-123.2)                                        | 0.142                 | 0.060                  | 0.296                   | 0.071                   | 0.047                   |
| GLCA (ng/mL)  | 3.5 (3.5-3.5)                        | 3.5 (3.5-4.8)                                              | 3.5 (3.5-7.1)                                            | 0.003                 | 0.009                  | 0.023                   | <0.001                  | 0.138                   |
| DCA (ng/mL)   | 93.1 (38.2-171.7)                    | 72.1 (27.3-199.9)                                          | 152.4 (75.1-270.5)                                       | <0.001                | <0.001                 | 0.329                   | <0.001                  | <0.001                  |
| TCA (ng/mL)   | 17.7 (10.8-32.1)                     | 12.0 (5.8-34.5)                                            | 7.0 (5.0-12.0)                                           | <0.001                | <0.001                 | 0.008                   | <0.001                  | <0.001                  |

Sample size,  $n=326$ . Data are expressed as medians and interquartile ranges (in parenthesis). Differences among the four patient groups were tested by Kruskal-Wallis test. The inter-group differences were tested by the Dunn's post-hoc test. \*P values were also adjusted for age, sex and BMI (by analysis of covariance [ANCOVA]).

**Abbreviations:** TUDCA, tauroursodeoxycholic acid; TCA, taurocholic acid; GUDCA, glyoursodeoxycholic acid; GCA, glycocholic acid; TCDCa, taurochenodeoxycholic acid; TDCA, taurodeoxycholic acid; CA, cholic acid; UDCA, ursodeoxycholic acid, GCDCA, glyochenodeoxycholic acid; GDCA, glycodeoxycholic acid; CDCA, chenodeoxycholic acid; GLCA, glycolithocholic acid; DCA deoxycholic acid; HDCA, hyodeoxycholic acid

**Supplementary Table S3** - Plasma BA concentrations in the whole population, simultaneously stratified by T2DM status and use of incretins (i.e., DPP-IV inhibitors or GLP-1 receptor agonists).

|               | Without T2DM<br>(n=102)<br>(Group A) | With T2DM and<br>without incretins<br>(n=130) (Group B) | With T2DM and with<br>incretins (n=94)<br>(Group C) | P-values<br>for trend | P-values for<br>trend* | P-values for<br>A vs B | P-values for A<br>vs C | P-values for B<br>vs C |
|---------------|--------------------------------------|---------------------------------------------------------|-----------------------------------------------------|-----------------------|------------------------|------------------------|------------------------|------------------------|
| TUDCA (ng/mL) | 3.5 (3.5-3.5)                        | 3.5 (3.5-3.5)                                           | 3.5 (3.5-3.5)                                       | 0.977                 | 0.529                  | 0.304                  | 0.316                  | 0.498                  |
| GUDCA (ng/mL) | 32.1 (13.7-57.7)                     | 22.5 (12.3-55.8)                                        | 24.3 (11.1-61.5)                                    | 0.332                 | 0.519                  | 0.076                  | 0.139                  | 0.398                  |
| GCA (ng/mL)   | 40.4 (25.6-77.1)                     | 45.5 (21.8-88.8)                                        | 45.8 (26.6-72.0)                                    | 0.922                 | 0.682                  | 0.359                  | 0.368                  | 0.498                  |
| TCDCA (ng/mL) | 13.7 (7.9-30.9)                      | 40.9 (21.9-87.0)                                        | 42.9 (21.8-64.3)                                    | <0.001                | <0.001                 | <0.001                 | <0.001                 | 0.355                  |
| TDCA (ng/mL)  | 3.5 (3.5-10.4)                       | 13.7 (3.5-36.7)                                         | 10.7 (3.5-24.7)                                     | <0.001                | <0.001                 | <0.001                 | <0.001                 | 0.211                  |
| UDCA (ng/mL)  | 11.5 (3.5-27.4)                      | 7.4 (3.5-21.3)                                          | 10.4 (3.5-29.2)                                     | 0.310                 | 0.126                  | 0.128                  | 0.383                  | 0.078                  |
| CA (ng/mL)    | 19.7 (8.6-72.4)                      | 8.0 (3.5-39.0)                                          | 11.6 (3.5-52.9)                                     | <0.001                | 0.006                  | <0.001                 | <0.001                 | 0.235                  |
| GCDCA (ng/mL) | 109.1 (58.6-191.4)                   | 247.7 (135.0-478.2)                                     | 256.5 (128.8-524.6)                                 | <0.001                | <0.001                 | <0.001                 | <0.001                 | 0.469                  |
| HDCA (ng/mL)  | 3.5 (3.5-3.5)                        | 3.5 (3.5-5.9)                                           | 3.5 (3.5-5.5)                                       | <0.001                | 0.002                  | <0.001                 | <0.001                 | 0.428                  |
| GDCA (ng/mL)  | 31.3 (17.3-75.8)                     | 99.8 (53.5-192.8)                                       | 93.5 (61.4-170.0)                                   | <0.001                | <0.001                 | <0.001                 | <0.001                 | 0.349                  |
| CDCA (ng/mL)  | 51.7 (23.4-131.7)                    | 40.8 (13.1-111.8)                                       | 54.4 (24.2-162.6)                                   | 0.105                 | 0.038                  | 0.041                  | 0.442                  | 0.032                  |
| GLCA (ng/mL)  | 3.5 (3.5-3.5)                        | 3.5 (3.5-5.6)                                           | 3.5 (3.5-7.0)                                       | 0.003                 | 0.034                  | <0.001                 | <0.001                 | 0.098                  |
| DCA (ng/mL)   | 93.1 (38.2-171.7)                    | 116.8 (59.1-219.1)                                      | 163.2 (70.1-298.7)                                  | 0.002                 | 0.005                  | 0.002                  | <0.001                 | 0.042                  |
| TCA (ng/mL)   | 17.7 (10.8-32.1)                     | 7.0 (5.0-18.0)                                          | 7.0 (5.0-10.5)                                      | <0.001                | <0.001                 | <0.001                 | <0.001                 | 0.150                  |

Sample size,  $n=326$ . Data are expressed medians and interquartile ranges (in parenthesis). Differences among the four groups of patients were tested by Kruskal-Wallis test. The inter-group differences were tested by the Dunn's post-hoc test. \*P values were also adjusted for age, sex and BMI (using analysis of covariance [ANCOVA]).

**Abbreviations:** TUDCA, Tauroursodeoxycholic acid; TCA, taurocholic acid; GUDCA, glyoursodeoxycholic acid; GCA, glycocholic acid; TCDCA, taurochenodeoxycholic acid; TDCA, taurodeoxycholic acid; CA, cholic acid; UDCA, ursodeoxycholic acid, GCDCA, glycochenodeoxycholic acid; GDCA, glycodeoxycholic acid; CDCA, chenodeoxycholic acid; GLCA, glycolithocholic acid; DCA deoxycholic acid; HDCA, hyodeoxycholic acid

**Supplementary Table S4** – Spearman’s correlation matrix among plasma BA concentrations, plasma lipids and fasting glucose levels.

|                                  | TUDCA<br>(ng/mL) | GUDCA<br>(ng/mL) | GCA<br>(ng/mL) | TCDCa<br>(ng/mL) | TDCA<br>(ng/mL) | UDCA<br>(ng/mL) | CA<br>(ng/mL) | GCDCA<br>(ng/mL) | HDCA<br>(ng/mL) | GDCA<br>(ng/mL) | CDCA<br>(ng/mL) | GLCA<br>(ng/mL) | DCA<br>(ng/mL) | TCA<br>(ng/mL) | Total<br>cholesterol<br>(mmol/L) | LDL-C<br>(mmol/L) | HDL-C<br>(mmol/L) | TG<br>(mmol/L) | Glucose<br>(mg/dL) |
|----------------------------------|------------------|------------------|----------------|------------------|-----------------|-----------------|---------------|------------------|-----------------|-----------------|-----------------|-----------------|----------------|----------------|----------------------------------|-------------------|-------------------|----------------|--------------------|
| TUDCA<br>(ng/mL)                 | 1.00             |                  |                |                  |                 |                 |               |                  |                 |                 |                 |                 |                |                |                                  |                   |                   |                |                    |
| GUDCA<br>(ng/mL)                 | 0.332*           | 1.00             |                |                  |                 |                 |               |                  |                 |                 |                 |                 |                |                |                                  |                   |                   |                |                    |
| GCA<br>(ng/mL)                   | 0.312*           | 0.539*           | 1.00           |                  |                 |                 |               |                  |                 |                 |                 |                 |                |                |                                  |                   |                   |                |                    |
| TCDCa<br>(ng/mL)                 | 0.291*           | 0.316*           | 0.661*         | 1.00             |                 |                 |               |                  |                 |                 |                 |                 |                |                |                                  |                   |                   |                |                    |
| TDCA<br>(ng/mL)                  | 0.227*           | 0.134*           | 0.510*         | 0.667*           | 1.00            |                 |               |                  |                 |                 |                 |                 |                |                |                                  |                   |                   |                |                    |
| UDCA<br>(ng/mL)                  | 0.213*           | 0.713*           | 0.194*         | 0.060            | -0.124*         | 1.00            |               |                  |                 |                 |                 |                 |                |                |                                  |                   |                   |                |                    |
| CA<br>(ng/mL)                    | 0.126*           | 0.272*           | 0.262*         | 0.076            | -0.093          | 0.411*          | 1.00          |                  |                 |                 |                 |                 |                |                |                                  |                   |                   |                |                    |
| GCDCA<br>(ng/mL)                 | 0.278*           | 0.579*           | 0.737*         | 0.794*           | 0.478*          | 0.269*          | 0.161*        | 1.00             |                 |                 |                 |                 |                |                |                                  |                   |                   |                |                    |
| HDCA<br>(ng/mL)                  | -0.061           | -0.110           | -0.051         | 0.046            | 0.213*          | -0.082          | -0.205*       | 0.040            | 1.00            |                 |                 |                 |                |                |                                  |                   |                   |                |                    |
| GDCA<br>(ng/mL)                  | 0.197*           | 0.302*           | 0.498*         | 0.493*           | 0.788*          | 0.065           | -0.073        | 0.602*           | 0.330*          | 1.00            |                 |                 |                |                |                                  |                   |                   |                |                    |
| CDCA<br>(ng/mL)                  | 0.166*           | 0.411*           | 0.322*         | 0.249*           | 0.001           | 0.636*          | 0.771*        | 0.383*           | -0.143*         | 0.087           | 1.00            |                 |                |                |                                  |                   |                   |                |                    |
| GLCA<br>(ng/mL)                  | 0.099            | 0.232*           | 0.245*         | 0.283*           | 0.364*          | 0.144*          | 0.067         | 0.389*           | 0.259*          | 0.496*          | 0.172           | 1.00            |                |                |                                  |                   |                   |                |                    |
| DCA<br>(ng/mL)                   | 0.007            | 0.130*           | 0.098          | 0.023            | 0.338*          | 0.386*          | 0.252*        | 0.142*           | 0.298*          | 0.588*          | 0.449*          | 0.351*          | 1.00           |                |                                  |                   |                   |                |                    |
| TCA<br>(ng/mL)                   | 0.281*           | 0.279*           | 0.692*         | 0.456*           | 0.396*          | 0.020           | 0.282*        | 0.293*           | -0.238*         | 0.085           | 0.191*          | 0.040           | -0.141*        | 1.00           |                                  |                   |                   |                |                    |
| Total<br>cholesterol<br>(mmol/L) | 0.034            | 0.036            | 0.019          | -0.251*          | -0.131*         | 0.020           | 0.210*        | -0.183*          | -0.192*         | -0.183*         | 0.046           | -0.181*         | -0.072         | 0.243          | 1.00                             |                   |                   |                |                    |
| LDL-C<br>(mmol/L)                | 0.035            | 0.021            | 0.011          | -0.271*          | -0.136*         | 0.031           | 0.239*        | -0.215*          | -0.226*         | -0.212*         | 0.055           | -0.217*         | -0.078         | 0.260*         | 0.935*                           | 1.00              |                   |                |                    |
| HDL-C<br>(mmol/L)                | -0.0154          | -0.045           | -0.033         | -0.056           | 0.011           | -0.119*         | -0.121*       | -0.057           | 0.110           | 0.052           | -0.125*         | 0.052           | -0.013         | -0.037         | 0.218*                           | 0.008             | 1.00              |                |                    |
| TG<br>(mmol/L)                   | -0.042           | 0.051            | 0.023          | 0.075            | 0.027           | 0.144*          | 0.013         | 0.081            | 0.015           | 0.039           | 0.073           | 0.007           | 0.095          | -0.038         | 0.057                            | 0.012             | -0.489*           | 1.00           |                    |
| Glucose<br>(mg/dL)               | -0.026           | -0.038           | 0.036          | 0.327*           | 0.264*          | -0.007          | -0.175*       | 0.256*           | 0.253*          | 0.333*          | 0.010           | 0.237*          | 0.186*         | -0.245*        | -0.346*                          | -0.357*           | -0.026            | 0.188*         | 1.00               |

Data are expressed as Spearman's rank correlation coefficients (rho coefficients). \*p<0.05

**Abbreviations:** TUDCA, tauroursodeoxycholic acid; TCA, taurocholic acid; GUDCA, glyoursodeoxycholic acid; GCA, glycocholic acid; TCDCa, taurochenodeoxycholic acid; TDCA, taurodeoxycholic acid; CA, cholic acid; UDCA, ursodeoxycholic acid, GCDCA, glycochenodeoxycholic acid; GDCA, glycodeoxycholic acid; CDCA, chenodeoxycholic acid; GLCA, glycolithocholic acid; DCA deoxycholic acid; HDCA, hyodeoxycholic acid; TG, triglycerides.
